1 **Telomere-to-telomere genome assembly of matsutake (*Tricholoma matsutake*)**

2

3 Hiroyuki Kurokochi<sup>1</sup>, Naoyuki Tajima<sup>2</sup>, Mitsuhiko P. Sato<sup>2</sup>, Kazutoshi Yoshitake<sup>3</sup>, Shuichi

4 Asakawa<sup>3</sup>, Sachiko Isobe<sup>2</sup>, Kenta Shirasawa<sup>2\*</sup>

5

6 <sup>1</sup>Department of Forest Science, Graduate School of Agricultural and Life Sciences, University of

7 Tokyo, Tokyo 113-8657, Japan

8 <sup>2</sup>Department of Frontier Research and Development, Kazusa DNA Research Institute, Kisarazu,

9 Chiba 292-0818, Japan

10 <sup>3</sup>Department of Aquatic Bioscience, Graduate School of Agricultural and Life Sciences, University

11 of Tokyo, Tokyo 113-8657, Japan

12

13 \*To whom correspondence should be addressed:

14 Kenta Shirasawa

15 2-6-7 Kazusa-Kamatari, Kisarazu, Chiba 292-0818, Japan

16 Tel.: +81-438-52-3935

17 Fax: +81-438-52-3934

18 E-mail: shirasaw@kazusa.or.jp

19

20 Running title: Telomere-to-telomere genome assembly of matsutake

21

## 1 **Abstract**

2 Here, we report the first telomere-to-telomere genome assembly of matsutake (*Tricholoma*  
3 *matsutake*), which consists of 13 chromosomes (spanning 160.7 Mb) and a 76 kb circular  
4 mitochondrial genome. The chromosome sequences were supported with telomeric repeats at the  
5 ends. GC-rich regions are located at the middle of the chromosomes and are enriched with long  
6 interspersed nuclear elements (LINEs). Repetitive sequences including long-terminal repeats (LTRs)  
7 and LINEs occupy 71.7% of the genome. A total of 28,322 potential protein-coding genes and 324  
8 tRNA genes were predicted. Sequence and structure variant analysis revealed 2,322,349 single  
9 nucleotide polymorphisms and 102,831 insertions and deletions, 0.6% of which disrupted gene  
10 structure and function and were therefore classified as deleterious mutations. As many as 683 copies  
11 of the LTR retrotransposon *MarY1* were detected in the matsutake genome, 91 of which were  
12 inserted in gene sequences. In addition, 187 sequence variations were found in the mitochondrial  
13 genome. The genomic data reported in this study would serve as a great reference for exploring the  
14 genetics and genomics of matsutake in the future, and the information gained would ultimately  
15 facilitate the conservation of this vulnerable genetic resource.

16  
17 **Key words:** Genome assembly; Long-read sequencing technology; Telomere-to-telomere

## 19 **Introduction**

20 Matsutake (*Tricholoma matsutake* [S. Ito et Imai] Singer), belonging to the phylum Basidiomycota,  
21 is an ectomycorrhizal fungus that coexists with Pinaceae and Fagaceae trees in a symbiotic  
22 association<sup>1,2</sup>. In the field, two spores of matsutake fuse together and grow to form a “shiro”, which  
23 is a symbiotic entity formed between matsutake and its host tree. One shiro produces a number of  
24 sporocarps during the growing season. The sporocarp of matsutake has been considered as one of the  
25 most valuable components of traditional Japanese cuisine since ancient times, as mentioned in  
26 Manyo-shu (a series of books for Japanese poetry compiled around 700 AD in Japan), owing to its  
27 pleasant aroma, which is largely attributed to 1-octen-3-ol (also known as matsutakeol)<sup>3,4</sup>; however,  
28 sporocarps are non-culturable. In 2019, the International Union for Conservation of Nature (IUCN)  
29 categorized matsutake as vulnerable. The production of sporocarps has drastically decreased in  
30 recent years<sup>5</sup> because of the deterioration of its growing environment. To understand the life cycle  
31 and life history of matsutake, safeguarding its production and conservation is necessary, which

1 requires genomic analysis.

2 Four assemblies of the matsutake genome are currently available in a public DNA database<sup>6,7</sup>.

3 However, the sequences are highly fragmented because contigs are enormous in number (2,545 to  
4 88,884) and short (N50 length = 2.9 to 320.9 kb), thus providing insufficient genome coverage.

5 Moreover, because retrotransposons such as *MarYI* span ~6 kb in length and are dispersed  
6 throughout the matsutake genome<sup>8</sup>, a full-length genome assembly may not be achieved with short-  
7 read and error-prone long-read sequencing technologies, both of which were employed to construct  
8 the four genome assemblies. Another reason why achieving a full-length genome assembly might be  
9 difficult is the diploid nature of the matsutake genome; it is difficult for symbiotic fungi to produce  
10 mononuclear hyphae (monokaryon) with haploid genomes. Unlike symbiotic fungi, saprophytic  
11 fungi produce mononuclear hyphae, and therefore can be easily sequenced using short-read and/or  
12 error-prone long-read technologies to obtain long contiguous genome assemblies.

13 Recently, the development of high-fidelity long-read (HiFi) technology (PacBio, Menlo Park,  
14 CA, USA) enabled the establishment of complete gapless assemblies of the human genome at the  
15 telomere-to-telomere level<sup>9</sup>, in which a single contig corresponds to a single chromosome. In this  
16 study, we applied the HiFi technology to address the complexity of the matsutake genome. Using  
17 this technology, we determined the total chromosome number of matsutake, which is consistent with  
18 the results of the few cytogenetics studies conducted to date<sup>10</sup>. Overall, this study represents a  
19 milestone in the cytogenetics-, genetics-, and genomics-focused research on matsutake mushroom.

20

## 21 **Materials and methods**

### 22 *Fungus material and DNA extraction*

23 Two sporocarps, which were probably ramets derived from a single shiro (radius > 2 m) that has  
24 been generating sporocarps for more than 20 years<sup>11</sup>, were collected from Ina, Nagano, Japan. The  
25 sporocarps were flash-frozen in liquid nitrogen, dried under vacuum, and then stored at room  
26 temperature until needed for DNA extraction.

27 Genomic DNA was extracted from the dried stipes using the cetyltrimethylammonium bromide  
28 (CTAB) method<sup>12</sup>. The concentration of the extracted DNA was measured using the Qubit dsDNA  
29 BR assay kit (Thermo Fisher Scientific, Waltham, MA, USA), and DNA fragment length was  
30 evaluated by agarose gel electrophoresis with Pippin Pulse (Sage Science, Beverly, MA, USA).

31

1 *DNA sequencing*

2 Genomic DNA was subjected to HiFi SMRTbell library construction using the SMRTbell Express  
3 Template Prep Kit 2.0 (PacBio), according to the manufacturer's instructions, with a minor  
4 modification. Because the genomic DNA was degraded, the DNA shearing step recommended in the  
5 protocol was skipped. The resultant DNA was fractionated with BluePippin (Sage Science) to  
6 eliminate fragments less than 10 kb in size. The DNA libraries prepared from the two sporocarps  
7 were indexed with unique barcode adapters, and sequenced on a single SMRT cell 8M on the Sequel  
8 IIE system (PacBio).

9

10 *Genome assembly and gene annotation*

11 Using the HiFi reads obtained from the Sequel IIE system (PacBio), the genome size of matsutake  
12 was estimated with GCE<sup>13</sup>, based on *k*-mer frequency (*k* = 21) calculated with Jellyfish<sup>14</sup> (version  
13 2.3.0). The reads were assembled using hifiasm<sup>15</sup> (version 0.16.1), with default parameters.  
14 Assembly completeness was evaluated with Benchmarking Universal Single-Copy Orthologs  
15 (BUSCO)<sup>16</sup> (version 5.2.2; default parameters) using lineage dataset agaricales\_odb10 (eukaryota,  
16 2020-08-05). Telomere sequences containing repeats of a 6 bp motif (5'-CCCTAA-3') were searched  
17 by BLASTN<sup>17</sup> (version 2.2.26), with an E-value cutoff of 1E-20. Nuclear genes were predicted with  
18 Funannotate (<https://doi.org/10.5281/zenodo.2604804>) (version 1.8.9) using RNA-Seq reads  
19 downloaded from the NCBI nucleotide database (accession number: SRR485866). Mitochondrial  
20 genes were predicted with Artemis<sup>18</sup>, in accordance with the gene sequences reported in previous  
21 mitochondrial genome assemblies (accession number: NC\_028135). The predicted genes were  
22 functionally annotated with emapper<sup>19</sup> (version 2.1.6; search option: mmseqs) implemented in  
23 EggNOG<sup>20</sup>, and with DIAMOND<sup>21</sup> (version 2.0.13; more sensitive mode) search against the  
24 UniProtKB<sup>22</sup> database. Simultaneously, gene sequences reported in the previous genome assembly,  
25 Trima3<sup>6</sup>, were mapped on to the current assembly with LiftOff<sup>23</sup> (version 1.6.3; parameter: -polish).  
26 Repetitive sequences in the assembly were identified with RepeatMasker  
27 (<https://www.repeatmasker.org>) (version 4.1.2; parameters: -poly and -xsmall) using repeat  
28 sequences registered in Repbase<sup>24</sup> and a *de novo* repeat library built with RepeatModeler  
29 (<https://www.repeatmasker.org>) (version 2.0.2a; default parameters). Sequences showing similarity  
30 to *MarY1* (accession number: AB028236; 6047 bp) and its long terminal repeats (LTRs; 426 bp)  
31 were searched by BLASTN<sup>17</sup>.

1

## 2 *Sequence variant analysis*

3 Single nucleotide polymorphisms (SNPs) and insertions and deletions (indels) were detected with  
4 genome sequence reads obtained from NCBI database (accession number: PRJNA726361). Low-  
5 quality bases and adapter sequences were removed with PRINSEQ<sup>25</sup> (version 0.20.4) and  
6 fastx\_clipper (parameter, -a AGATCGGAAGAGC), respectively, in the FASTX-Toolkit (version  
7 0.0.14; [http://hannonlab.cshl.edu/fastx\\_toolkit](http://hannonlab.cshl.edu/fastx_toolkit)). The remaining high-quality reads were mapped on  
8 to the current assembly with Bowtie2<sup>26</sup> (version 2.3.5.1; parameters: --local -I 100 -X 1000), and  
9 sequence variants were detected using the mpileup and call commands of BCFtools<sup>27</sup> (version 1.9).  
10 High-confidence variants were selected with VCFtools<sup>28</sup> (version 0.1.12b) using the following  
11 parameters: minimum read depth  $\geq 8$  (--minDP 8); minimum variant quality = 999 (--minQ 999);  
12 maximum missing data  $< 0.5$  (--max-missing 0.5); and minor allele frequency  $\geq 0.05$  (--maf 0.05).  
13 Insertions of *MarY1* were detected with PTEM<sup>29</sup> (version 1.03). Effects of nucleotide sequence  
14 variations on gene function were estimated with SNPeff<sup>30</sup> (version 4.3t).

15 Four matsutake genome assemblies downloaded from the NCBI database (accession numbers:  
16 BDDP01, Tricma30605\_assembly01; PKSN02, ASM293902v2; QMFF01, ASM331463v1;  
17 WIUY01, Trima3) were aligned against the genome assembly generated in this study using  
18 Minimap<sup>231</sup> (version 2.24; parameter: -cx asm20), with a mapping-quality cutoff of 60. The  
19 positions of genes, repeats, and genome alignments were compared using the intersection command  
20 in BEDtools<sup>32</sup> (version 2.27.0; default parameters).

21

## 22 **Results**

### 23 *DNA sequencing, data analysis, and genome assembly*

24 Genomic DNA was extracted from two dried sporocarps (samples A and B) of matsutake. The  
25 amount of DNA extracted from each sample (9  $\mu$ g) was sufficient for library construction; however,  
26 because of degradation (Supplementary Figure S1), the extracted DNA was used for library  
27 preparation without shearing. The resultant libraries were sequenced on a SMRT Cell 8M to obtained  
28 9.5 Gb (sample A) and 7.8 Gb (sample B) data, with N50 lengths of 11 kb (sample A) and 10 kb  
29 (sample B). The *k*-mer analysis detected two peaks (Supplementary Figure S2), indicating that the  
30 haploid genome size of matsutake was 149 Mb and the level of heterozygosity was high. The  
31 sequence reads of each sample were assembled separately to obtain two sets of contigs: 182 contigs

1 (165.5 Mb) for sample A, and 146 contigs (162.9 Mb) for sample B. Among these, 15 contigs (160.7  
2 Mb) of sample A and 12 contigs (159.2 Mb) of sample B, all of which were >1 Mb in length, were  
3 selected for further analysis.

4 Next, we searched for the telomeric motif, (CCCTAA)<sub>n</sub>, in the contigs (Figure 1). In sample A,  
5 the telomeric motif was found at both ends of nine contigs (A1, A2, A6, A8, A11, A12, A13, A14,  
6 and A16) and at one end of five contigs (A3, A4, A7, A10, and A15). In sample B, the motif was  
7 found at both ends of nine contigs (B1, B2, B3, B4, B5, B7, B8, B9, and B11) and at one end of  
8 three contigs (B6, B12, and B13). The average length of the telomeric sequence was 129 bp (21  
9 repeats), and ranged from 66 bp (11 repeats) to 168 bp (28 repeats).

10 Comparison of the two sets of genome assemblies revealed 10 pairs of perfectly aligned contigs  
11 (A1-B1, A2-B9, A6-B11, A8-B3, A10-B4, A11-B8, A12-B2, A13-B7, A14-B5, and A15-B12)  
12 (Figure 1). Three contigs of sample A (A3, A4, and A9) covered the entire sequence of one contig of  
13 sample B (B13). Furthermore, two contigs of sample A (A7 and A16) corresponded to one contig of  
14 sample B (B6). Thus, we concluded that contigs A3, A4, and A9 were unassembled, and contig B6  
15 was misassembled. Therefore, we joined contigs A3, A4, and A9 with 100 Ns to establish a single  
16 contig, and left contigs A7 and A16 as separate. Finally, 13 contigs spanning 160.7 Mb were  
17 obtained, of which 11 contigs possessed telomeric motifs at both ends, while two contigs were  
18 supported with the telomeric motif at either end. The 13 contigs represented 94.2% complete  
19 BUSCOs. The final assembly was designated as TMA\_r1.0, and the contigs were named  
20 TMA\_r1.0ch01 to TMA\_r1.0ch13 in order of decreasing sequence length (Figure 1, Table 1). The  
21 GC content was ca. 45% over the entire genome, with one peak (~55%) in each chromosome, except  
22 chromosome 1, which showed two peaks (Figure 2). In addition, we identified a 76,067 bp circular  
23 contig, which represented the mitochondrial genome of matsutake (Tma1.0mito).

24

#### 25 *Repetitive sequence analysis*

26 Repetitive sequences occupied a total physical distance of 115.2 Mb (71.7%) in the genome  
27 assembly (TMA\_r1.0; 160.7 Mb). Nine major types of repeats were identified in varying proportions  
28 (Table 2). The dominant repeat types in the chromosome sequences were LTRs (69.2 Mb) and long  
29 interspersed nuclear elements (LINEs; 5.9 Mb). LINEs were predominant in regions with high GC  
30 content in all chromosomes, whereas LTR retrotransposons were predominant in regions with low  
31 GC content (Figure 2). Repeat sequences unavailable in public databases totaled 16.2 Mb. The

1 *MarY1* LTR, which has been extensively studied to date, and its terminal repeats were present as 683  
2 and 3,240 copies, respectively, across all 13 chromosomes.

3

#### 4 *Gene prediction and annotation*

5 RNA-Seq reads were mapped on to the genome assembly of matsutake (TMA\_r1.0), with a mapping  
6 rate of 93.8%. Based on the sequence alignment, TMA\_r1.0 was predicted to contain a total of  
7 28,646 genes including 28,322 protein-coding genes and 324 tRNA genes (Table 1). These predicted  
8 genes possessed 90.2% complete BUSCOs. The mitochondrial genome was predicted to contain a  
9 total of 28 protein-coding genes, including 26 tRNA genes and 2 rRNA genes.

10 Additionally, sequence alignment revealed that of the 23,068 genes predicted in the previous  
11 assembly (Trima3), 22,326 were represented in the current assembly (TMA\_r1.0). Comparison of  
12 the genome positions of the two gene sets indicated that 12,761 of the 28,646 genes predicted in  
13 TMA\_r1.0 overlapped with 13,082 of the 22,326 genes in Trima3. The remaining 15,885 genes (=   
14 28,646 – 12,761) were unique to TMA\_r1.0.

15

#### 16 *Comparative analysis of the current and previous genome assemblies of matsutake*

17 The TMA\_r1.0 genome assembly was compared with the four publicly available matsutake genome  
18 assemblies, Tricma30605\_assembly01, ASM293902v2, ASM331463v1, and Trima3. Sequence  
19 coverage in GC-rich regions was mostly low in the four assemblies (Supplementary Figure S3). The  
20 Tricma30605\_assembly01 covered the longest part of TMA\_r1.0 (79.5%) among the four  
21 assemblies, followed by Trima3 (78.9%), ASM331463v1 (75.9%), and ASM293902v2 (67.9%).  
22 When genomic positions of the alignments with the four assemblies were merged, 94.4% of the  
23 TMA\_r1.0 was covered by at least one of the four assemblies, while the remaining 5.6% was not  
24 covered by any assembly.

25

#### 26 *Sequence variants in divergent matsutake lines*

27 Whole-genome resequencing data of 14 matsutake lines were obtained from a public DNA database.  
28 High-quality reads (3.9 Gb per sample) were mapped on to TMA\_r1.0, with an average mapping rate  
29 of 96.5%, except one sample (TM\_NH), which showed a mapping rate of 73.3%. Totals of  
30 2,322,349 SNPs and 102,831 indels were identified in the 13 chromosomes (Figure 2). The most  
31 prominent variant type was intergenic mutations (2,106,014, 86.8%) followed by missense mutations

1 (148,235, 6.1%) and synonymous mutations (99,674, 4.1%) (Supplementary Table S1). The number  
2 of deleterious variations, which could disrupt gene structure and function, was 13,479 (0.6%); these  
3 were categorized as high-impact variants.

4 *MarYI* insertions were detected in all 13 chromosomes at 747 positions across the 14 lines  
5 (Figure 2). The number of *MarYI* insertions per line ranged from 67 in EF to 135 in W2. Among the  
6 747 positions, 91 were located within the gene coding sequence, and 556 were located in upstream  
7 and downstream regions of genes.

8 In the mitochondrial genome, a total of 90 SNPs and 97 indels were identified across all 14  
9 lines, although no *MarYI* insertion was detected. Deleterious mutations were found in three  
10 mitochondrial genes, *orf123*, *orf290*, and *cox1*.

11

## 12 **Discussion**

13 This study presents the telomere-to-telomere genome sequence of matsutake comprising 13  
14 chromosomes (Figure 1, Table 1). To assemble the matsutake genome, we not only considered the  
15 telomeric repeat motif but also identified the centromeric regions and sequenced two independent  
16 samples. GC-rich regions were found at a single position in all chromosomes, except chromosome 1,  
17 which had two GC-rich regions (Figure 2). Interestingly, the GC-rich regions were enriched with  
18 LINEs but devoid of LTRs (Figure 2). Together, these observations suggest that GC-rich regions  
19 represent centromeres, and that chromosome 1 is a dicentric chromosome formed by the telomeric  
20 fusion of two chromosomes. We also compared the genome assemblies generated from two  
21 independent data sets (samples A and B) (Figure 1). Consequently, it was possible to identify a  
22 misassembled region and an unassembled region (Table 1), which led to the establishment of a  
23 telomere-to-telomere genome assembly. To the best of our knowledge, haploid chromosome number  
24 of matsutake ( $n = 7$ ) has been reported in only one study to date<sup>10</sup>. Constructing a telomere-to-  
25 telomere assembly could serve as an alternative to karyotyping for determining the chromosome  
26 number of a species, for which no chromosome information is available.

27 The telomere-to-telomere genome assembly generated in this study spans a physical distance of  
28 160.7 Mb and covers the entire genome of matsutake. The genome size of matsutake is larger than  
29 that of other mushroom species<sup>6,7</sup> because of the high proportion of repetitive sequences (Table 2)<sup>33</sup>.  
30 Owing to its high content of repetitive sequences (Table 2) and high heterozygosity (Supplementary  
31 Figure S2), the matsutake genome could not be fully sequenced with short-read and error-prone



1 long-read sequencing technologies. The HiFi sequencing technology (~10 kb read length) employed  
2 in this study likely helped overcome the problem posed by repetitive sequences, such as *MarYI* (~6  
3 kb), thus enabling the construction of the telomere-to-telomere genome assembly. Owing to the long  
4 contigs and high genome coverage, 28,646 genes were predicted in the matsutake genome. Of these  
5 genes, 15,885 had not been represented in the previous assembly (Trima3).

6 The genome sequences and predicted genes could help us understand the ecophysiology of a  
7 shiro and thus reveal the mechanism of sporocarp formation. All SNPs, indels, and transposon  
8 insertions in the genome were identified, and their chromosomal locations were determined. This  
9 information could be used to reveal the genetic diversity of matsutake in nature, conserve its genetic  
10 resources, and ensure its production. Furthermore, sequence variant analysis, followed by genome-  
11 wide association study, could reveal the genetic mechanisms underlying phenotypic variations in the  
12 physiological and metabolomic traits of matsutake. As mentioned above, the matsutake genome  
13 assembly constructed in this study could serve as a reference for further genetic studies.

14

#### 15 **Data availability**

16 Raw sequence reads were deposited in the Sequence Read Archive (SRA) database of the DNA Data  
17 Bank of Japan (DDBJ) under the accession number DRA014434. Assembled sequences are available  
18 at DDBJ (accession numbers AP026538 - AP026551) and Plant GARDEN (<https://plantgarden.jp>).

19

#### 20 **Acknowledgments**

21 We thank Prof. S. Kuraku (National Institute of Genetics, Japan) for helpful discussions; T.  
22 Kurokochi for providing the matsutake samples; and Y. Kishida, C. Minami, K. Ozawa, H. Tsuruoka,  
23 and A. Watanabe (Kazusa DNA Research Institute) for technical assistance. This study was  
24 supported in part by JSPS KAKENHI (16K20964, 20H00429, 22H05172, and 22H05181) and the  
25 Kazusa DNA Research Institute Foundation.

26

## 1   **References**

- 2   1. Yamada, A., Endo, N., Murata, H., Ohta, A., and Fukuda, M. 2014, Tricholoma matsutake Y1  
3       strain associated with Pinus densiflora shows a gradient of in vitro ectomycorrhizal specificity  
4       with Pinaceae and oak hosts. *Mycoscience*, **55**, 27–34.
- 5   2. Van Gevelt, T. 2014, The role of state institutions in non-timber forest product  
6       commercialisation: a case study of Tricholoma matsutake in South Korea. *Int. For. Rev.*, **16**, 1–  
7       13.
- 8   3. Iwade, I. 1936, Über die charakteristischen Bestandteile der höhren-pilze (II). *J Jpn For Soc*,  
9       **18**, 528–36.
- 10  4. Murahashi, S. 1938, Uber die riechstoffe des matsutake (Armillaria Matsutake Ito et Imai  
11       Agaricaceae). *Sci Pap Inst Phys Chem Res*, **34**, 155–72.
- 12  5. Yamanaka, T., Yamada, A., and Furukawa, H. 2020, Advances in the cultivation of the highly-  
13       prized ectomycorrhizal mushroom Tricholoma matsutake. *Mycoscience*, **61**, 49–57.
- 14  6. Miyauchi, S., Kiss, E., Kuo, A., et al. 2020, Large-scale genome sequencing of mycorrhizal  
15       fungi provides insights into the early evolution of symbiotic traits. *Nat. Commun.*, **11**, 5125.
- 16  7. Li, H., Wu, S., Ma, X., et al. 2018, The Genome Sequences of 90 Mushrooms. *Sci. Rep.*, **8**,  
17       9982.
- 18  8. Murata, H., and Yamada, A. 2000, marY1, a member of the gypsy group of long terminal repeat  
19       retroelements from the ectomycorrhizal basidiomycete Tricholoma matsutake. *Appl. Environ.*  
20       *Microbiol.*, **66**, 3642–5.
- 21  9. Nurk, S., Koren, S., Rhie, A., et al. 2022, The complete sequence of a human genome. *Science*,  
22       **376**, 44–53.
- 23  10. Tominaga, Y. 1963, Studies on the life history of Japanese pine mushroom, Armillaria  
24       matsutake Ito et Imai. *Bull Hiroshima Agr Col*, **2**, 105–45.
- 25  11. Kurokochi, H., Zhang, S., Takeuchi, Y., Tan, E., Asakawa, S., and Lian, C. 2017, Local-Level  
26       Genetic Diversity and Structure of Matsutake Mushroom (Tricholoma matsutake) Populations  
27       in Nagano Prefecture, Japan, Revealed by 15 Microsatellite Markers. *Journal of Fungi*, p. 23.
- 28  12. Doyle, J. J., and Doyle, J. L. 1990, Isolation of plant DNA from fresh tissue. *Focus*, **12**, 13–5.
- 29  13. Liu, B., Shi, Y., Yuan, J., et al. 2013, August 9, Estimation of genomic characteristics by  
30       analyzing k-mer frequency in de novo genome projects. *arXiv:1308.2012*.
- 31  14. Marçais, G., and Kingsford, C. 2011, A fast, lock-free approach for efficient parallel counting of  
32       occurrences of k-mers. *Bioinformatics*, **27**, 764–70.
- 33  15. Cheng, H., Concepcion, G. T., Feng, X., Zhang, H., and Li, H. 2021, Haplotype-resolved de  
34       novo assembly using phased assembly graphs with hifiasm. *Nat. Methods*, **18**, 170–5.
- 35  16. Simão, F. A., Waterhouse, R. M., Ioannidis, P., Kriventseva, E. V., and Zdobnov, E. M. 2015,  
36       BUSCO: assessing genome assembly and annotation completeness with single-copy orthologs.

- 1        *Bioinformatics*, **31**, 3210–2.
- 2    17. Altschul, S. F., Madden, T. L., Schäffer, A. A., et al. 1997, Gapped BLAST and PSI-BLAST: a  
3        new generation of protein database search programs. *Nucleic Acids Res.*, **25**, 3389–402.
- 4    18. Carver, T., Harris, S. R., Berriman, M., Parkhill, J., and McQuillan, J. A. 2012, Artemis: an  
5        integrated platform for visualization and analysis of high-throughput sequence-based  
6        experimental data. *Bioinformatics*, **28**, 464–9.
- 7    19. Cantalapiedra, C. P., Hernández-Plaza, A., Letunic, I., Bork, P., and Huerta-Cepas, J. 2021,  
8        eggNOG-mapper v2: Functional Annotation, Orthology Assignments, and Domain Prediction at  
9        the Metagenomic Scale. *Mol. Biol. Evol.*, **38**, 5825–9.
- 10   20. Huerta-Cepas, J., Szklarczyk, D., Heller, D., et al. 2019, eggNOG 5.0: a hierarchical,  
11        functionally and phylogenetically annotated orthology resource based on 5090 organisms and  
12        2502 viruses. *Nucleic Acids Res.*, **47**, D309–14.
- 13   21. Buchfink, B., Reuter, K., and Drost, H.-G. 2021, Sensitive protein alignments at tree-of-life  
14        scale using DIAMOND. *Nat. Methods*, **18**, 366–8.
- 15   22. The UniProt Consortium. 2017, UniProt: the universal protein knowledgebase. *Nucleic Acids*  
16        *Res.*, **45**, D158–69.
- 17   23. Shumate, A., and Salzberg, S. L. 2020, Liftoff: accurate mapping of gene annotations.  
18        *Bioinformatics*.
- 19   24. Jurka, J., Kapitonov, V. V., Pavlicek, A., Klonowski, P., Kohany, O., and Walichiewicz, J. 2005,  
20        Repbase Update, a database of eukaryotic repetitive elements. *Cytogenet. Genome Res.*, **110**,  
21        462–7.
- 22   25. Schmieder, R., and Edwards, R. 2011, Quality control and preprocessing of metagenomic  
23        datasets. *Bioinformatics*, **27**, 863–4.
- 24   26. Langmead, B., and Salzberg, S. L. 2012, Fast gapped-read alignment with Bowtie 2. *Nat.*  
25        *Methods*, **9**, 357–9.
- 26   27. Li, H. 2011, A statistical framework for SNP calling, mutation discovery, association mapping  
27        and population genetical parameter estimation from sequencing data. *Bioinformatics*, **27**, 2987–  
28        93.
- 29   28. Danecek, P., Auton, A., Abecasis, G., et al. 2011, The variant call format and VCFtools.  
30        *Bioinformatics*, **27**, 2156–8.
- 31   29. Kang, H., Zhu, D., Lin, R., et al. 2016, A novel method for identifying polymorphic  
32        transposable elements via scanning of high-throughput short reads. *DNA Res.*, **23**, 241–51.
- 33   30. Cingolani, P., Platts, A., Wang, L. L., et al. 2012, A program for annotating and predicting the  
34        effects of single nucleotide polymorphisms, SnpEff: SNPs in the genome of *Drosophila*  
35        *melanogaster* strain w1118; iso-2; iso-3. *Fly*, **6**, 80–92.
- 36   31. Li, H. 2018, Minimap2: pairwise alignment for nucleotide sequences. *Bioinformatics*, **34**,

- 1           3094–100.
- 2    32. Quinlan, A. R., and Hall, I. M. 2010, BEDTools: a flexible suite of utilities for comparing  
3           genomic features. *Bioinformatics*, **26**, 841–2.
- 4    33. Min, B., Yoon, H., Park, J., et al. 2020, Unusual genome expansion and transcription  
5           suppression in ectomycorrhizal *Tricholoma matsutake* by insertions of transposable elements.  
6           *PLoS One*, **15**, e0227923.
- 7

1 **Table 1** Statistics of the matsutake genome assembly

| <b>Chromosome</b> | <b>Sequence length (bp)</b> | <b>No. of genes</b> | <b>Contigs of sample A</b> | <b>Contigs of sample B</b> |
|-------------------|-----------------------------|---------------------|----------------------------|----------------------------|
| Tma1.0ch01        | 19,249,005                  | 3,124               | A3, A4, A9                 | B13                        |
| Tma1.0ch02        | 13,874,649                  | 2,147               | A6                         | B11                        |
| Tma1.0ch03        | 13,809,479                  | 2,888               | A16                        | B6 (bottom)                |
| Tma1.0ch04        | 13,409,878                  | 2,584               | A11                        | B8                         |
| Tma1.0ch05        | 12,860,286                  | 2,423               | A10                        | B4                         |
| Tma1.0ch06        | 12,376,747                  | 2,372               | A8                         | B3                         |
| Tma1.0ch07        | 11,987,682                  | 2,101               | A7                         | B6 (top)                   |
| Tma1.0ch08        | 11,264,506                  | 2,027               | A1                         | B1                         |
| Tma1.0ch09        | 10,996,241                  | 1,862               | A15                        | B12                        |
| Tma1.0ch10        | 10,915,969                  | 1,886               | A13                        | B7                         |
| Tma1.0ch11        | 10,203,996                  | 1,724               | A12                        | B2                         |
| Tma1.0ch12        | 9,912,917                   | 1,714               | A14                        | B5                         |
| Tma1.0ch13        | 9,869,253                   | 1,794               | A2                         | B9                         |
| <b>Total</b>      | <b>160,730,608</b>          | <b>28,646</b>       |                            |                            |

2

1 **Table 2** Repetitive sequences in the matsutake genome

| Type of repetitive sequence | Copy number | Length (bp) | Proportion of genome (%) |
|-----------------------------|-------------|-------------|--------------------------|
| SINEs                       | 304         | 51,368      | 0.0                      |
| LINEs                       | 7,377       | 9,428,495   | 5.9                      |
| LTR elements                | 60,502      | 69,150,848  | 43.0                     |
| DNA transposons             | 10,805      | 7,760,391   | 4.8                      |
| Small RNA                   | 362         | 70,121      | 0.0                      |
| Satellites                  | 81          | 17,133      | 0.0                      |
| Simple repeats              | 9,262       | 422,530     | 0.3                      |
| Low complexity              | 970         | 56,370      | 0.0                      |
| Unclassified                | 68,440      | 26,094,240  | 16.2                     |

2

1 **Figure legends**

2 **Figure 1** Comparative map of contigs of samples A and B.

3 Dots indicate sequences similar between the two samples. Red and blue arrows indicate telomeric  
4 motifs detected at the ends of contigs of samples A and B, respectively. Numbers in the plot indicate  
5 chromosome numbers in the final assembly (TMA\_r1.0). Contigs A5 and B10 are lacked because of  
6 the short sequence length (<1 Mb).

7 **Figure 2** Structures and components of the matsutake genome.

8 Bars indicates the GC content (black) and numbers of genes (blue), LINEs (red), and LTRs (orange)  
9 within a 100 kb window. Green and purple bars indicate the number of sequence variants (SNPs and  
10 indels) and number of *MarY1* insertions, respectively.

11

12 **Supplementary data**

13 **Supplementary Table S1** Annotation of variants detected among the 14 matsutake lines.

14 **Supplementary Figure S1** Genomic DNA extracted from dried matsutake sporocarps.

15 Lanes 1 and 2 indicate the genomic DNA of matsutake samples A and B, respectively. The three  
16 molecular weight markers used are as follows: Marker 7 GT (Nippongene, Tokyo, Japan),  $\lambda$ -HindIII  
17 digest (Takara Bio, Kusatsu, Japan), and 2.5 kb DNA Ladder (Takara Bio).

18 **Supplementary Figure S2** Estimation of the genome size of matsutake, based on *k*-mer analysis (*k*  
19 = 21) with the given multiplicity values.

20 **Supplementary Figure S3** Genome coverage of the assemblies generated in previous studies.

21 Blue, green, black, and red lines indicate the genome coverage of Trima3,  
22 Tricma30605\_assembly01, ASM293902v2, and ASM331463v1, respectively, within a 100 kb  
23 window. Gray shadows indicate regions with high GC content.

24

## Sample A

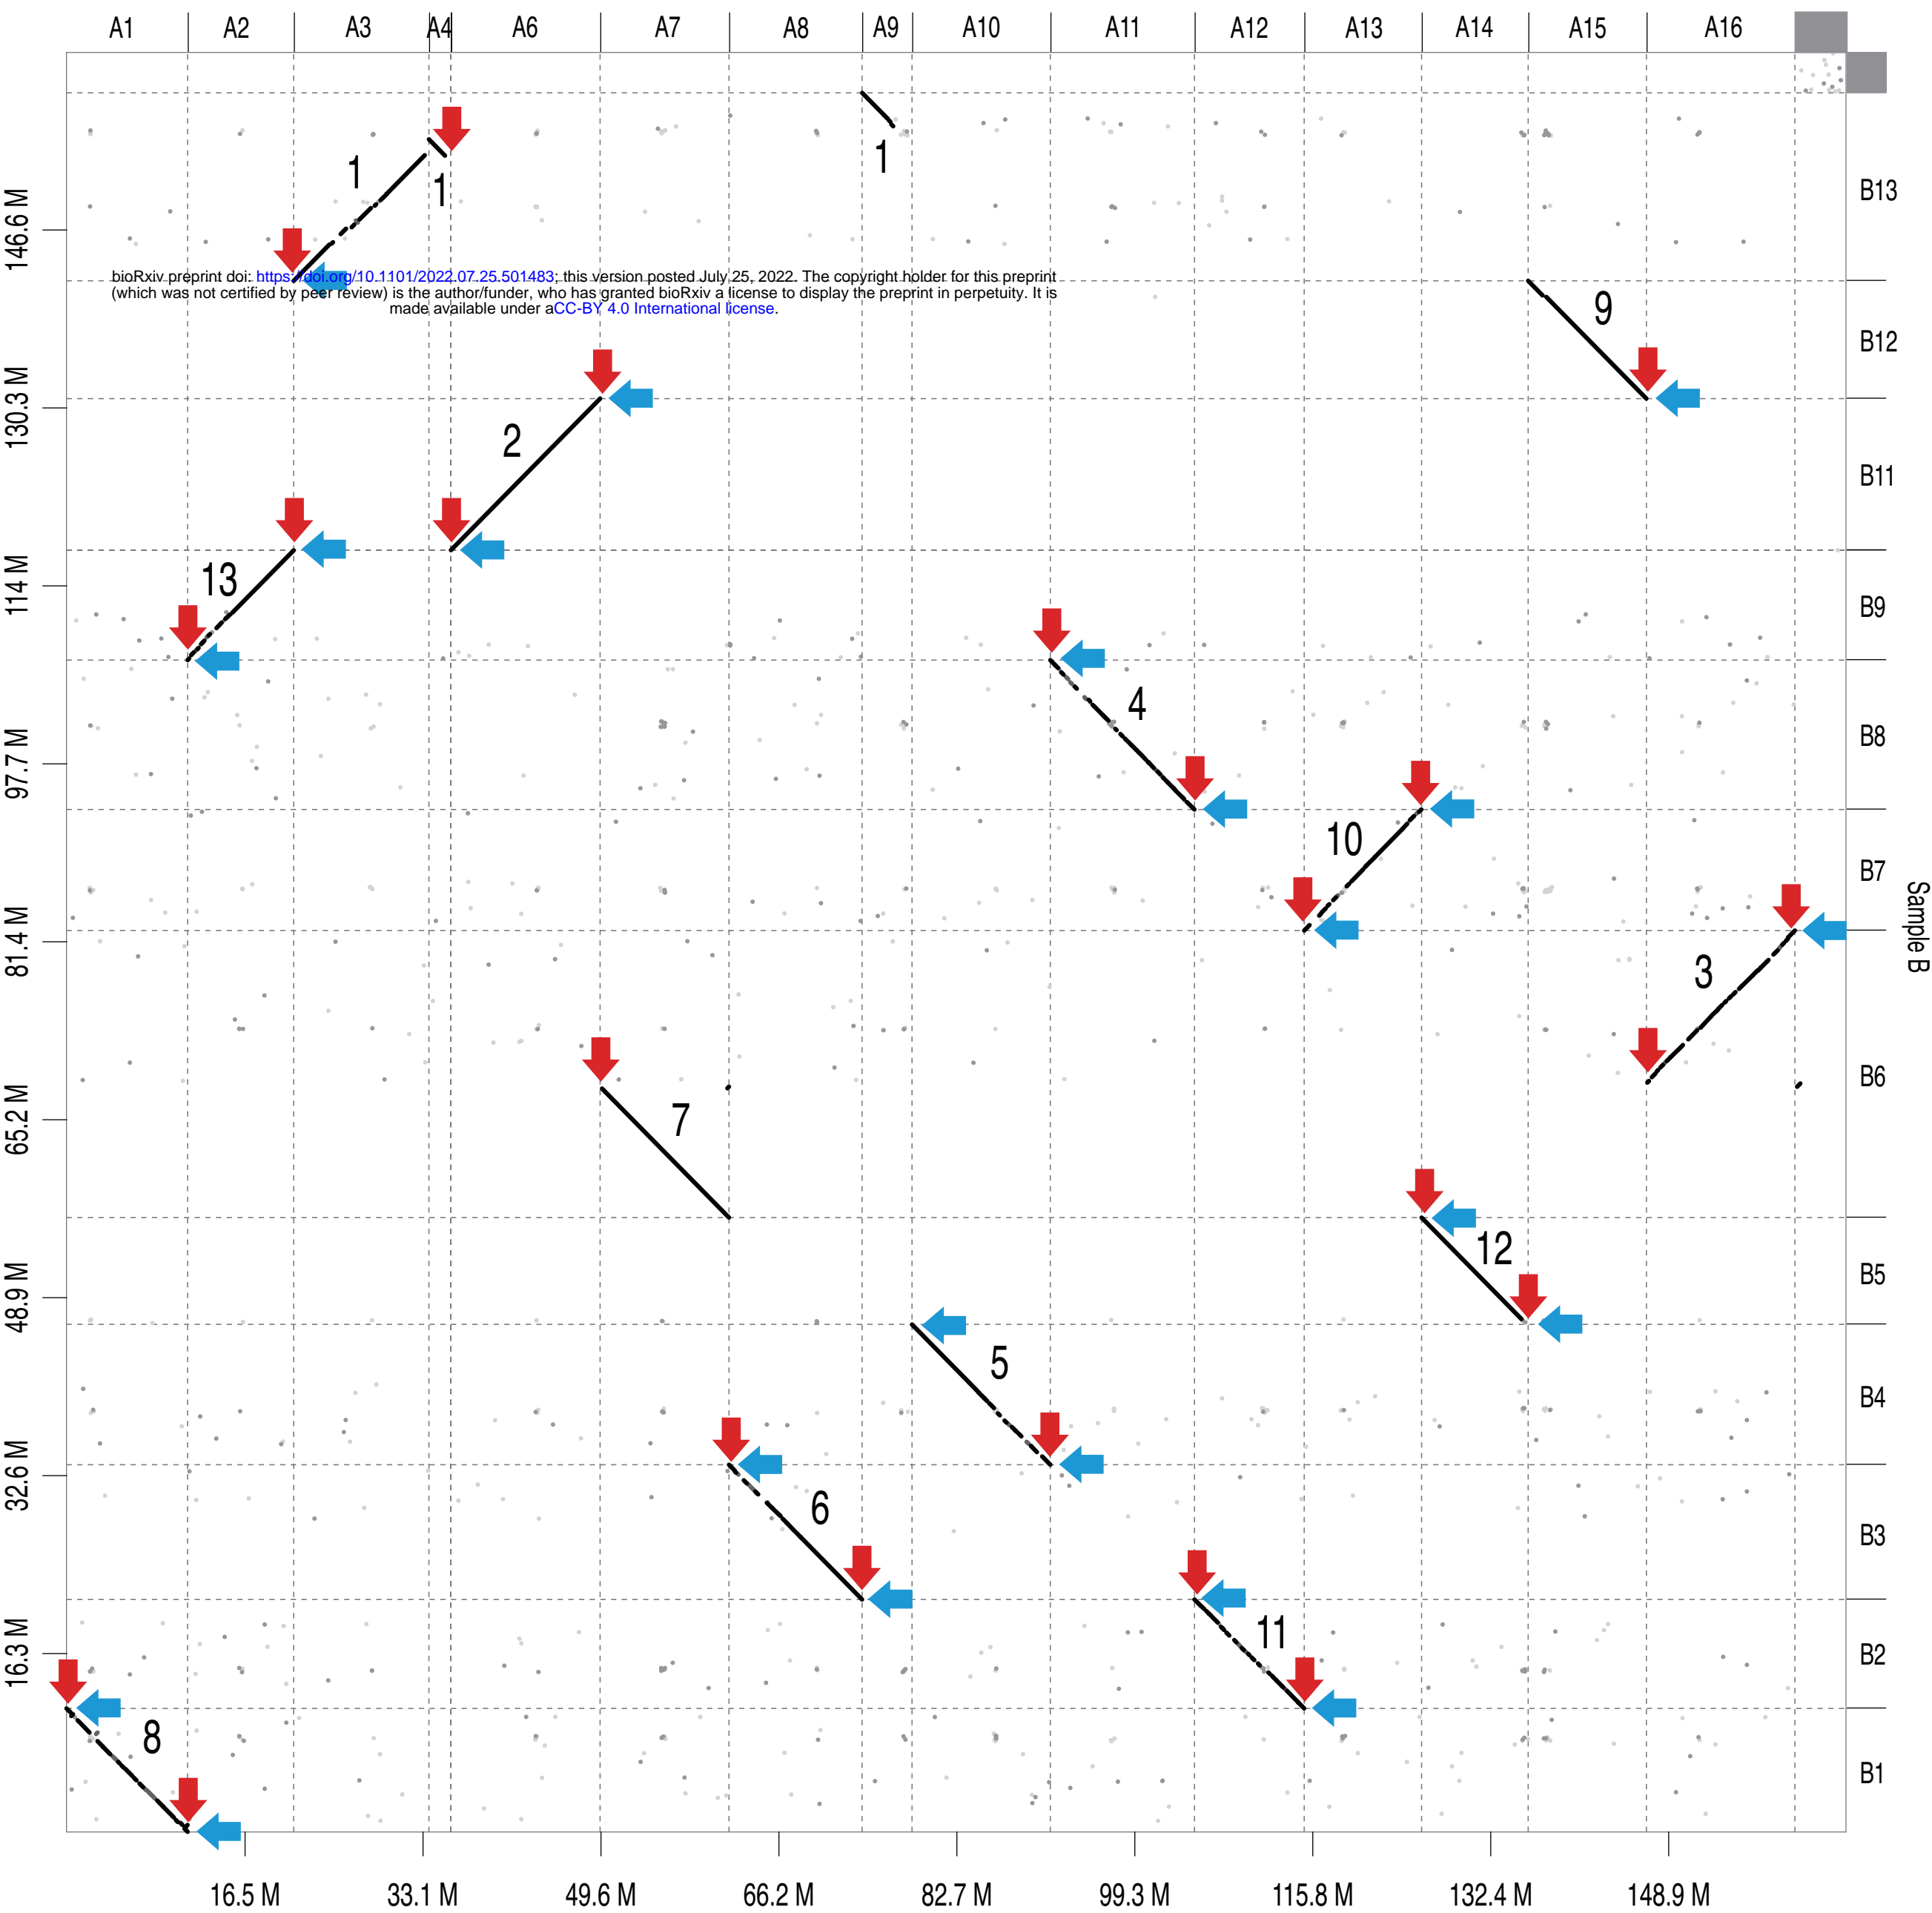



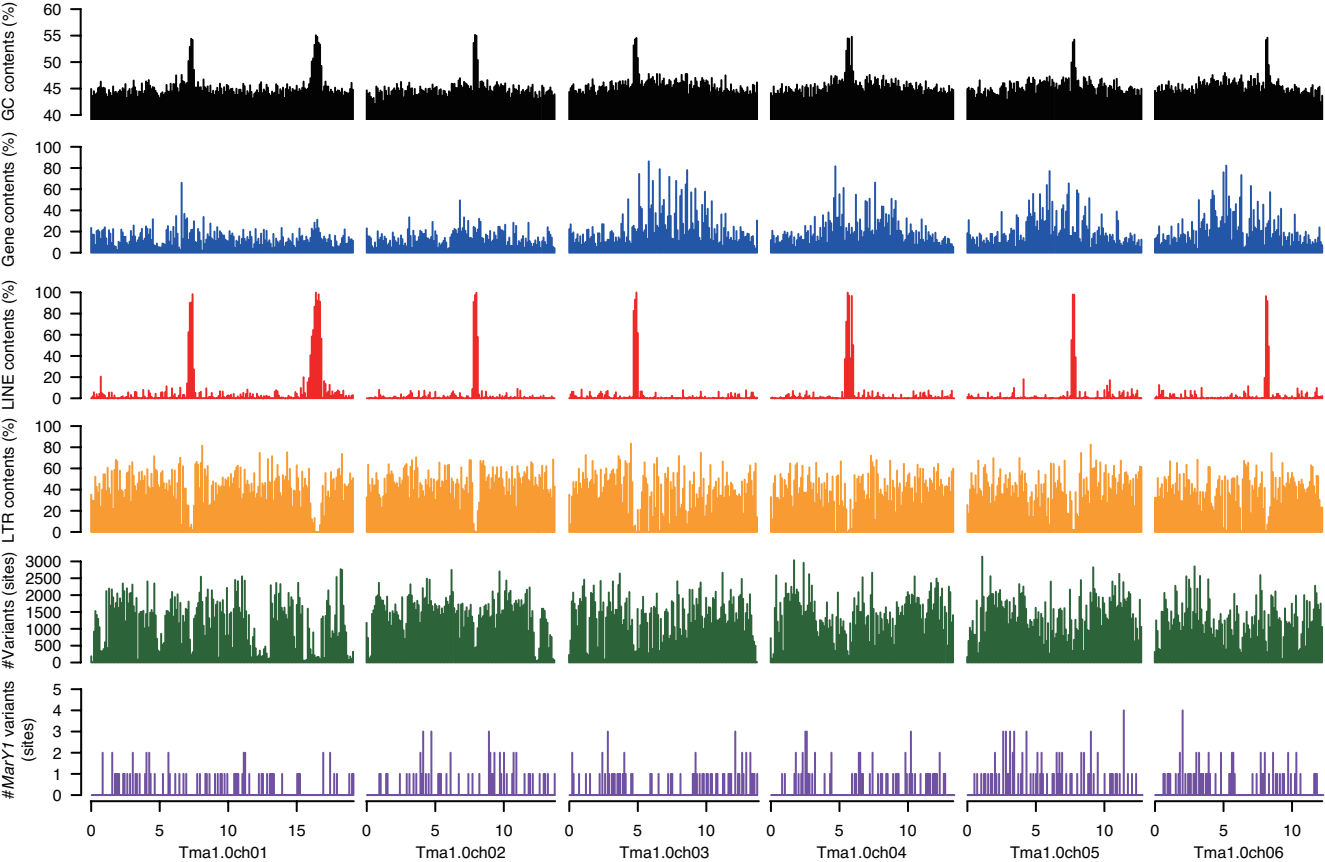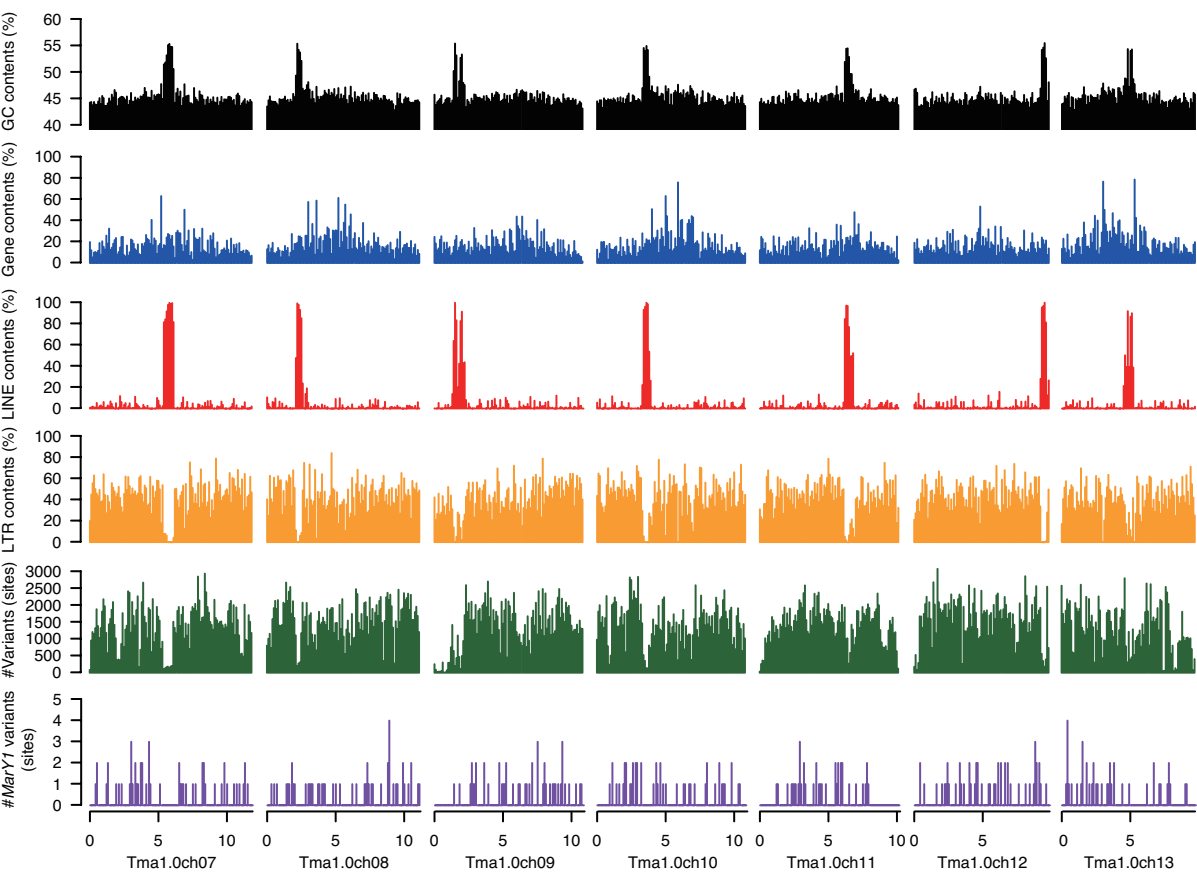

Source: http://biorxiv.org/content/10.1101/2022.07.25.501483v1.full.pdf
